# Supplementary material for: Necroptosis promotes cell-autonomous activation of proinflammatory cytokine gene expression
Source: PubMed Central journal article supplement (PMC5923285; doi:10.1038/s41419-018-0524-y), 2018-04-27

# Supplementary Figure 1

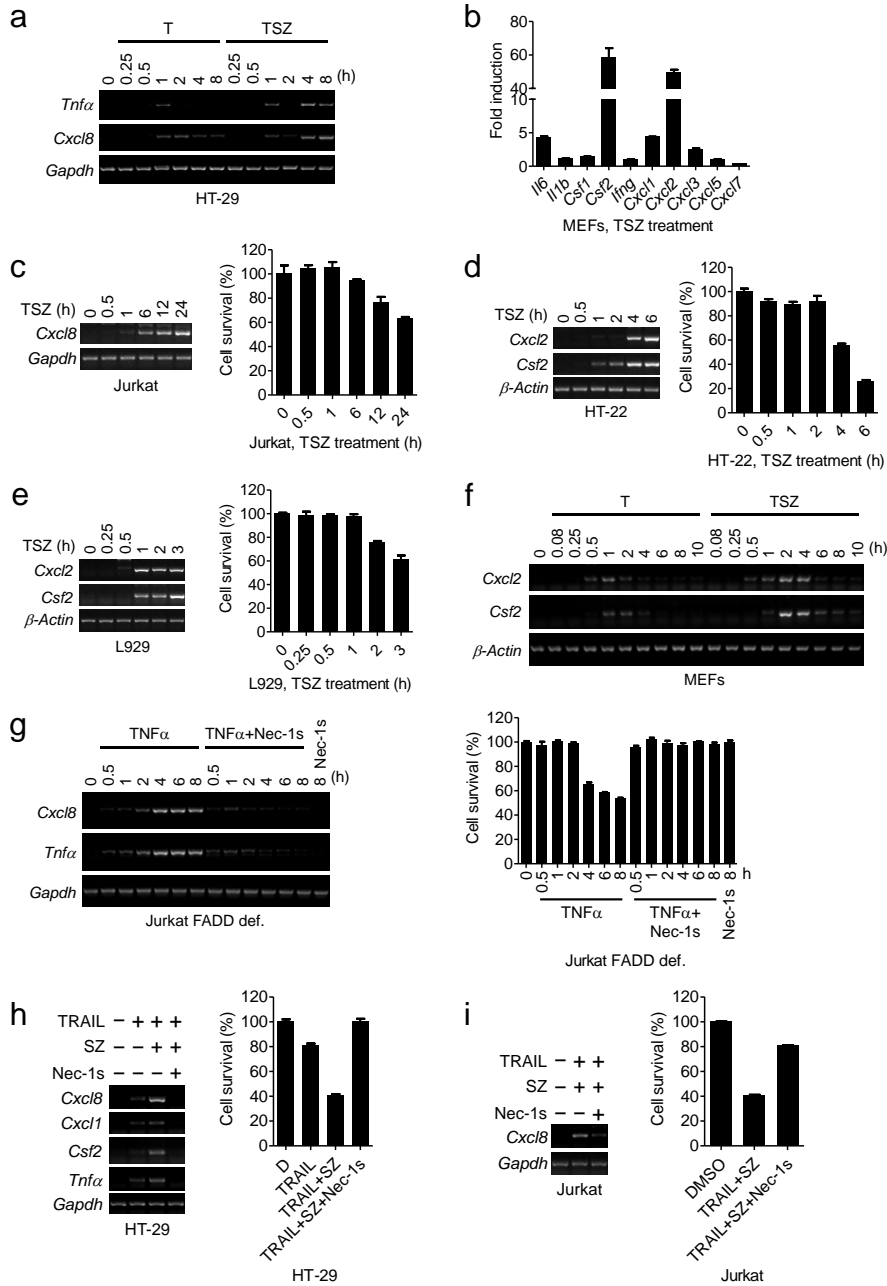

# Supplementary Figure 2

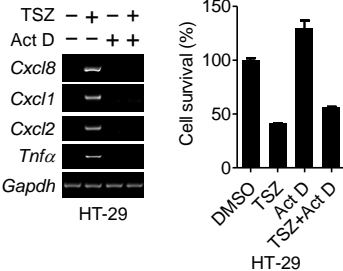

# Supplementary Figure 3

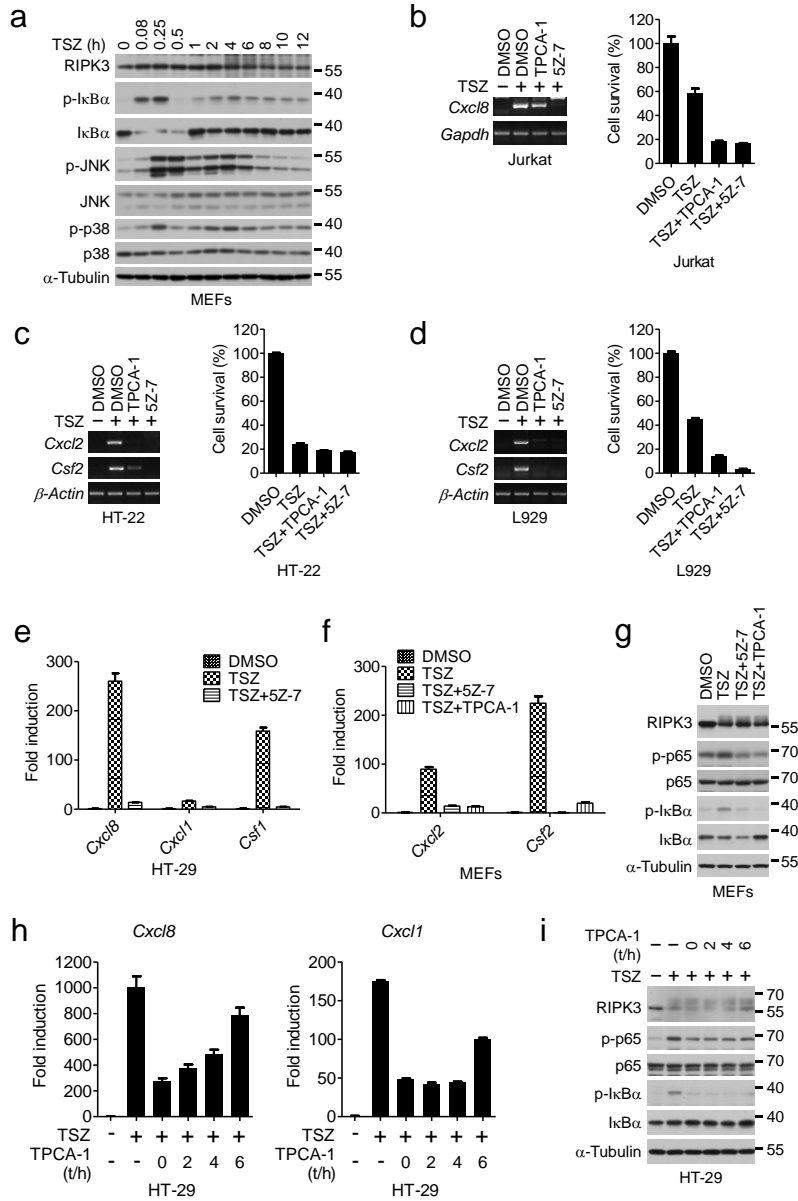

# Supplementary Figure 4

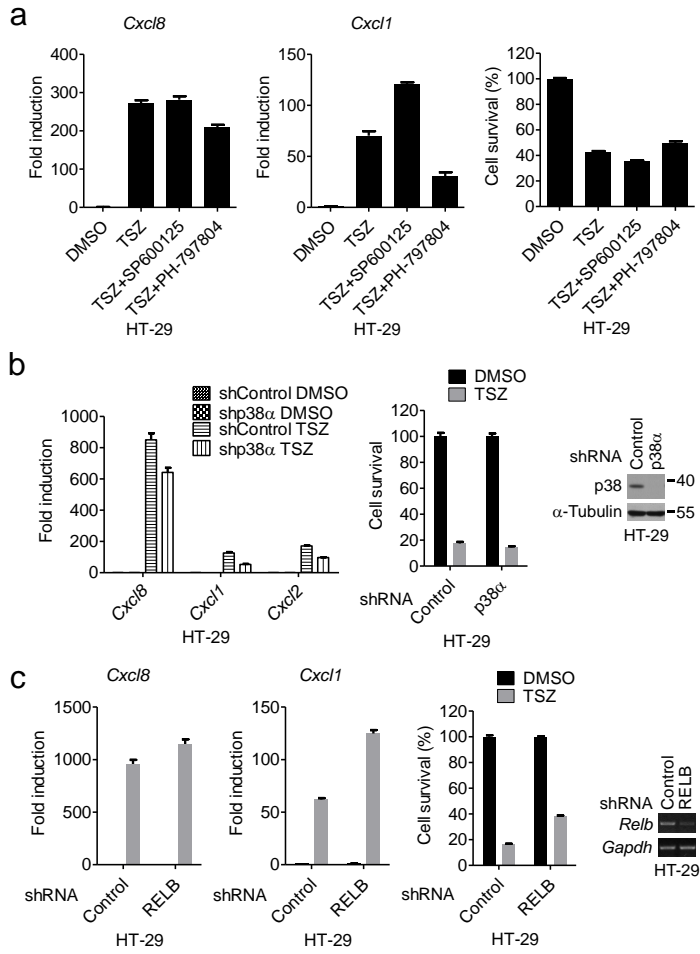

# Supplementary Figure 5

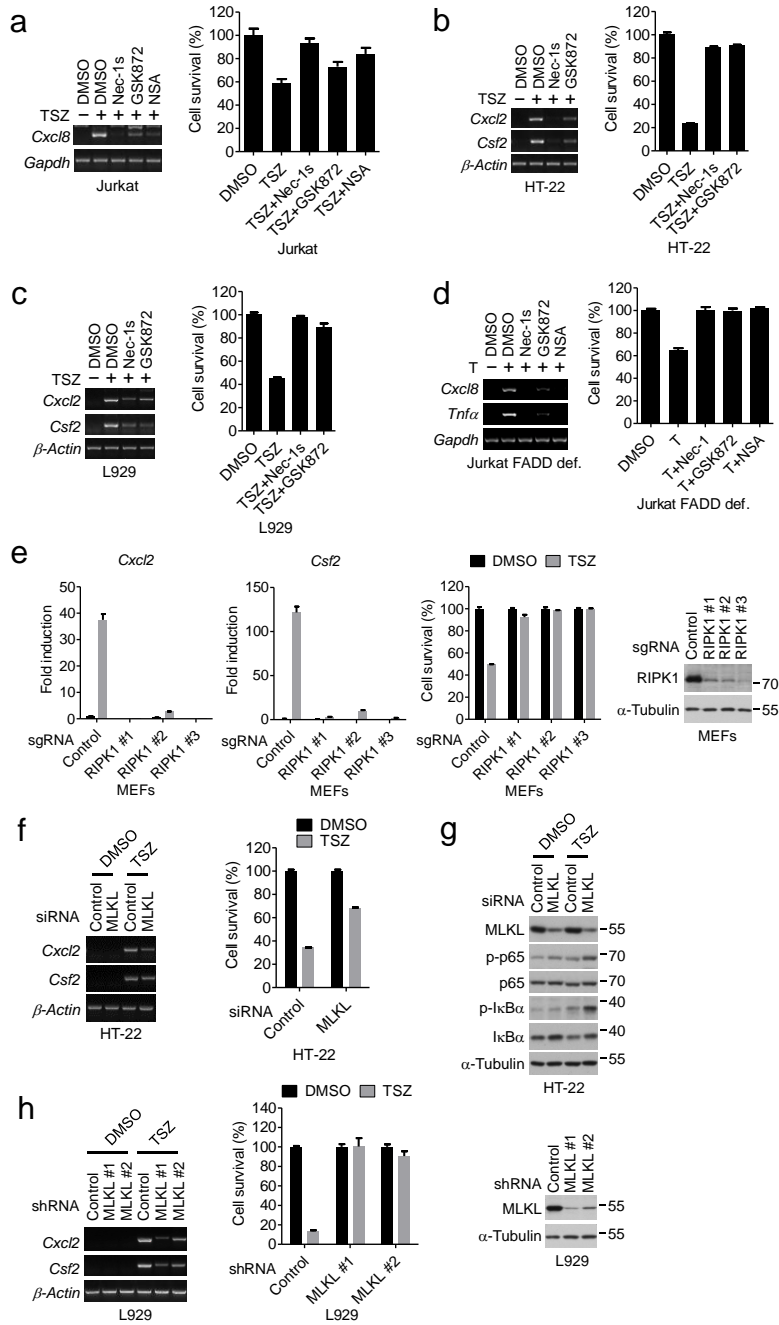

# Supplementary Figure 6

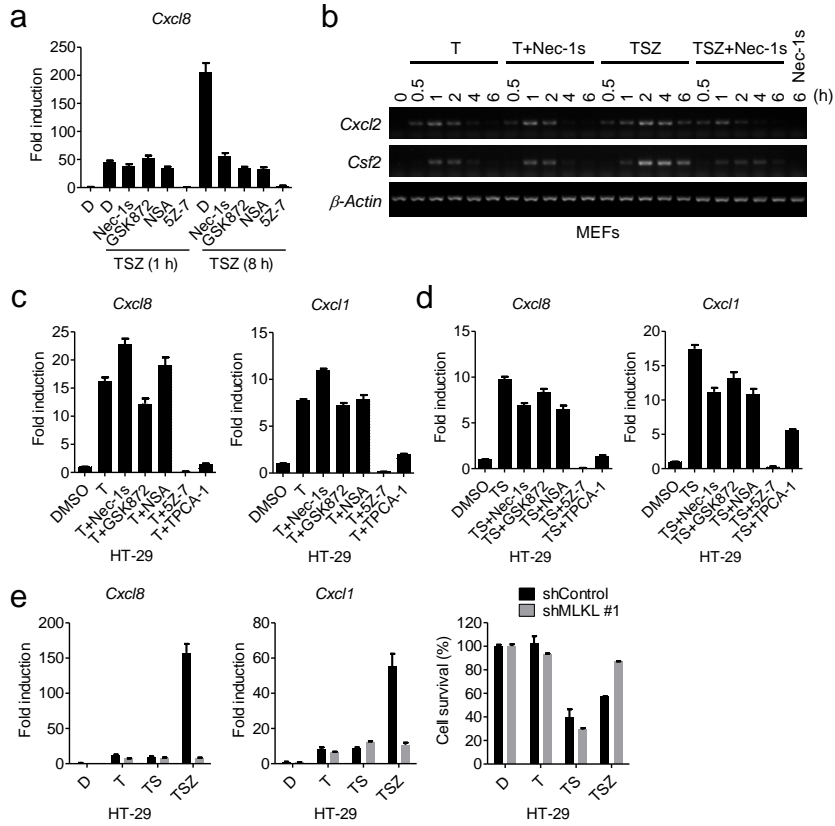

# Supplementary Figure 7

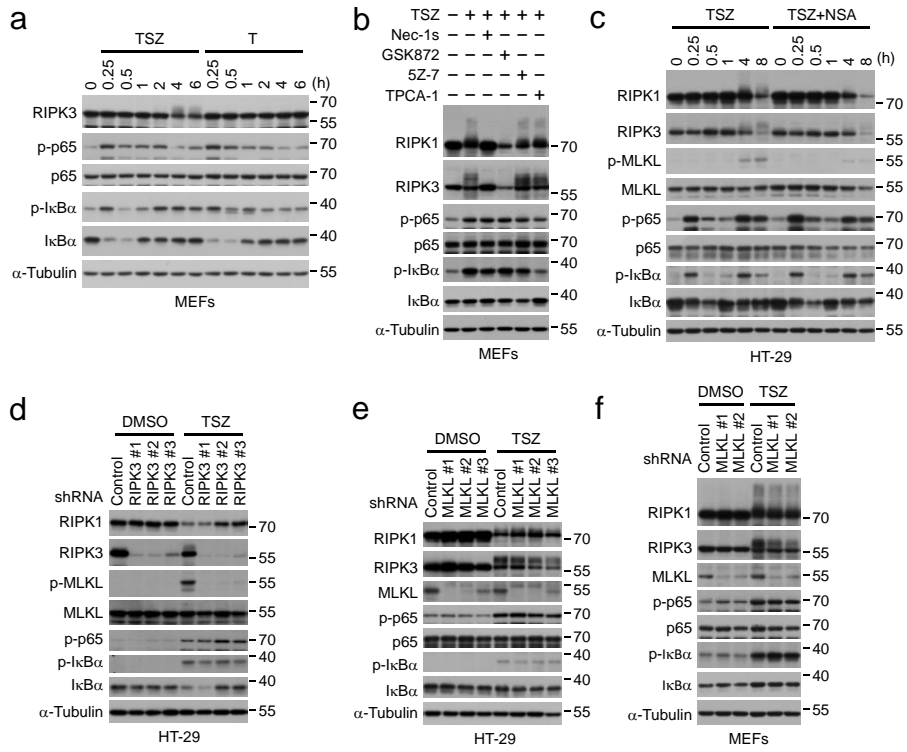

# Supplementary Figure 8

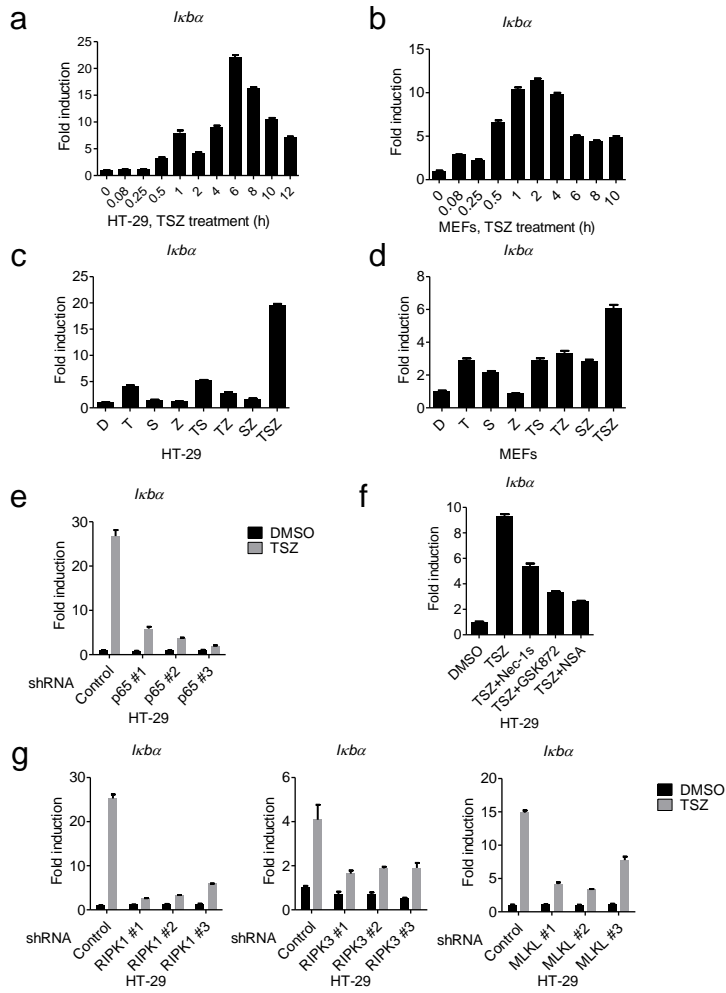



# Supplementary Figure 9

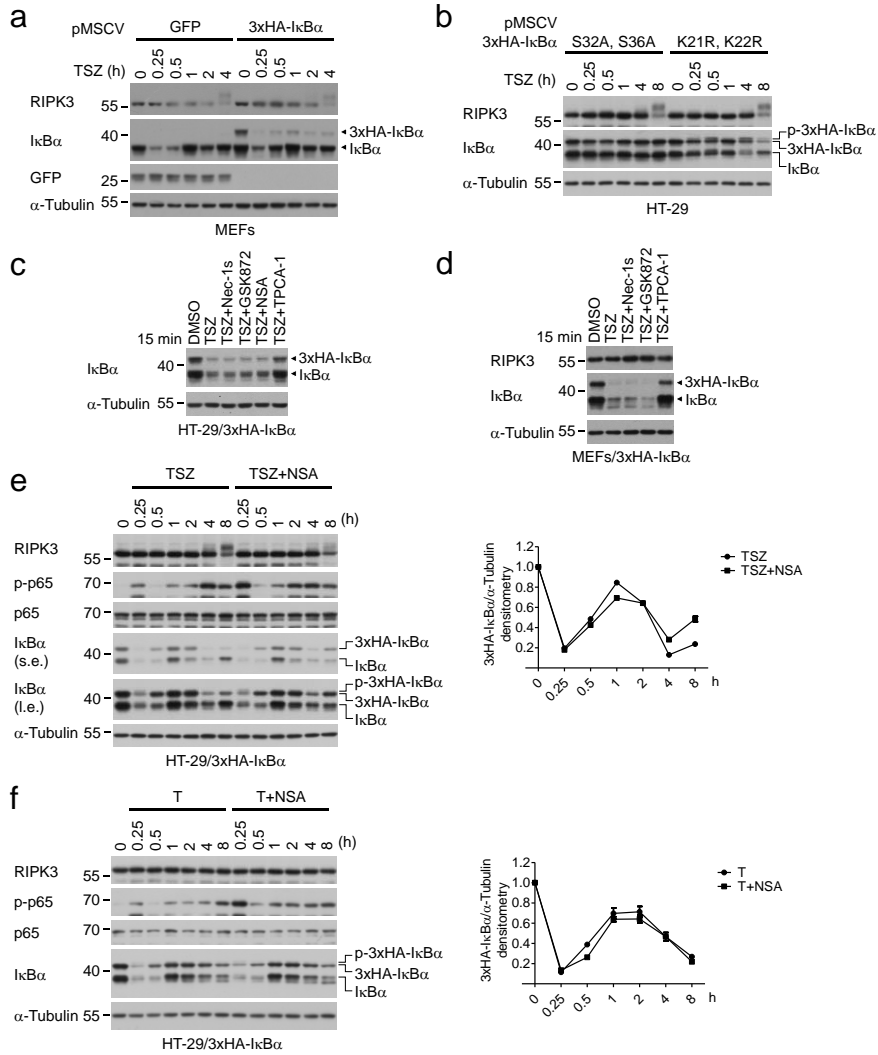

# Supplementary Figure 10

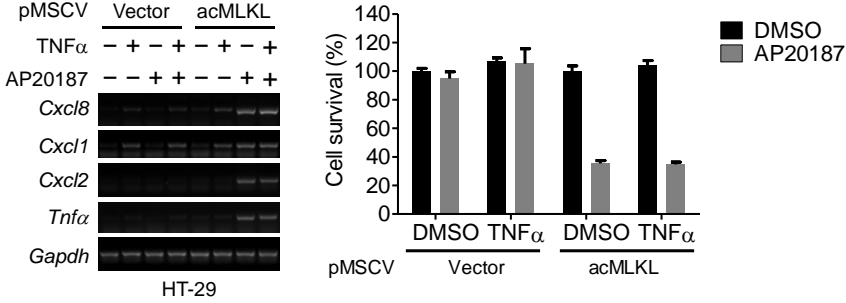

Supplement: 41419_2018_524_MOESM2_ESM.pdf [file 41419_2018_524_MOESM2_ESM.pdf]
