# Supplementary material for: Necroptosis promotes cell-autonomous activation of proinflammatory cytokine gene expression
Source: PubMed Central journal article supplement (PMC5923285; doi:10.1038/s41419-018-0524-y), 2018-04-27
Supplement: 41419_2018_524_MOESM3_ESM.pdf [file 41419_2018_524_MOESM3_ESM.pdf]

Supplementary Table 1. Short hairpin RNA (shRNA) used in this study.

| shRNA             | Species | Sense sequence (5'-3')                                      |
|-------------------|---------|-------------------------------------------------------------|
| RIPK1 #1          | human   | CCGGGTAGTACTCTGGGCGATATTTCTCGAGAAATATCGCCCAGAGTACTACTTTTTG  |
| RIPK1 #2          | human   | CCGGGCAAAGACCTTACGAGAATTTCTCGAGAAATTTCTCGTAAGGTCTTTGCTTTTTG |
| RIPK1 #3          | human   | CCGGGACGCCTCACTTAGTGGATAACTCGAGTTATCCACTAAGTGAGGCGTCTTTTTG  |
| RIPK3 #1          | human   | CCGGGGCGACCGCTCGTTAACATATCTCGAGATATGTTAACGAGCGGTTCGCTTTTTG  |
| RIPK3 #2          | human   | CCGGCTACAGCTTCGGGATCCTAATCTCGAGATTAGGATCCCGAAGCTGTAGTTTTG   |
| RIPK3 #3          | human   | CCGGAGGCCACAGGGTTGGTATAATCTCGAGATTATAACCAACCCTGTGGCCTTTTTG  |
| MLKL #1           | human   | CCGGGAGTCAAATCTACAGCATATCCTCGAGGATATGCTGTAGATTTGACTCTTTTTG  |
| MLKL #2           | human   | CCGGCCTTCGGCATTGGGTTATCTACTCGAGTAGATAACCAATGCCGAAGGTTTTG    |
| MLKL #3           | human   | CCGGGTGACTTGATTTGATCAATAGCTCGAGCTATTGATCAAATCAAGTCACTTTTTG  |
| p65 #1            | human   | CCGGCGGATTGAGGAGAAACGTAACCTCGAGTTTACGTTTCTCCTCAATCCGTTTTG   |
| p65 #2            | human   | CCGGAGAGGACATTGAGGTGTATTTCTCGAGAAATACACCTCAATGTCTCTTTTTG    |
| p65 #3            | human   | CCGGATGGATTCAATACAGCTTAATCTCGAGATTAAGCTGTAATGAATCCATTTTTG   |
| p38 $\alpha$      | human   | CCGGGTACTTCCTGTGTACTCTTTACTCGAGTAAAGAGTACACAGGAAGTACTTTTTG  |
| RELB              | human   | CCGGCATGCTTCTGAAGTGGACATACTCGAGTATGTCCACTTCAGAAGCATGTTTTG   |
| $\beta$ -TrCP2 #1 | human   | CCGGACTCTCAAGTACCGACATTTCTCGAGAAATGTCGGTACTTGAAGAGTTTTTG    |
| $\beta$ -TrCP2 #2 | human   | CCGGAGAAGACTTGGCCTCTAATTTCTCGAGAAATTAGAGGCCAAGTCTTCTTTTTG   |
| MLKL #1           | mouse   | CCGGAGATCCAGTTCAACGATATATCTCGAGATATATCGTTGAACTGGATCTTTTTG   |
| MLKL #2           | mouse   | CCGGTCCCAACATCTTGCGTATATTCTCGAGAATATACGCAAGATGTTGGGATTTTTG  |
| p65 #1            | mouse   | CCGGGGAGTACCCTGAAGCTATAACCTCGAGGTTATAGCTTCAGGGTACTCCTTTTTG  |
| p65 #2            | mouse   | CCGGAGGCCATATAGCCTTACTATCCTCGAGGATAGTAAGGCTATATGGCCTTTTTG   |

Supplementary Table 2. Primers used in this study.

| Gene                            | Species | Primer sequence (5'-3')                                             |
|---------------------------------|---------|---------------------------------------------------------------------|
| <i>Cxcl8</i>                    | human   | Forward: CAGTTTTGCCAAGGAGTGCT; Reverse: ACTTCTCCACAACCCTCTGC        |
| <i>Cxcl1</i>                    | human   | Forward: CCCCAAGAACATCCAAAGTGT; Reverse: TGGATTTGTCAGTTCAGCA        |
| <i>Cxcl2</i>                    | human   | Forward: CACTCAAGAATGGGCAGAAAG; Reverse: TCAGGAACAGCCACCAATAAG      |
| <i>Csfl</i>                     | human   | Forward: TGGCGAGCAGGAGTATCAC; Reverse: AGGTCTCCATCTGACTGTCAAT       |
| <i>Ikba</i>                     | human   | Forward: GATCCGCCAGGTGAAGGG; Reverse: GCAATTTCTGGCTGGTTGG           |
| <i>Tnfa</i>                     | human   | Forward: CCCAGGCAGTCAGATCATCT; Reverse: GGACCTGGGAGTAGATGAGG        |
| <i>Relb</i>                     | human   | Forward: TTTAACAACCTGGGCATCC; Reverse: CGCAGCTCTGATGTGTTTGT         |
| <i><math>\beta</math>-Trcp2</i> | human   | Forward: AAACCAGCCTGGAATGTTTG; Reverse: CAGTCCATTGCTGAAGCGTA        |
| <i>Gapdh</i>                    | human   | Forward: TTGCCATCAATGACCCCTTCA; Reverse: CGCCCCACTTGATTTTGGGA       |
| <i>Cxcl1</i>                    | mouse   | Forward: CTATCGCCAATGAGCTGCG; Reverse: TCTGAACCAAGGGAGCTTCA         |
| <i>Cxcl2</i>                    | mouse   | Forward: CTCTCAAGGGCGGTCAAAAAGTT; Reverse: TCAGACAGCGAGGCACATCAGGTA |
| <i>Cxcl3</i>                    | mouse   | Forward: AGACCATCCAGAGCTTGACG; Reverse: GGACTTGCCGCTCTTCAGTA        |
| <i>Cxcl5</i>                    | mouse   | Forward: TTCCTCAGTCATAGCCGCAA; Reverse: TGGATCCAGACAGACCTCTCT       |
| <i>Cxcl7</i>                    | mouse   | Forward: TCAGACCTACATCGTCCTGC; Reverse: AGTGAACCTCTGGCCTGTAC        |
| <i>Csfl</i>                     | mouse   | Forward: ATGGACACCTGAAGGTCCTG; Reverse: GTTAGCATTGGGGGTGTTGT        |
| <i>Csf2</i>                     | mouse   | Forward: TTGGAAGCATGTAGAGGCCA; Reverse: CGCCCTTGAGTTTGGTGAAA        |
| <i>Il6</i>                      | mouse   | Forward: TACCACTCCCAACAGACCTG; Reverse: GGTA CTCCAGAAGACCAGAGG      |
| <i>Il1b</i>                     | mouse   | Forward: ACTCATTGTGGCTGTGGAGA; Reverse: TTGTTTCATCTCGGAGCCTGT       |
| <i>Ifng</i>                     | mouse   | Forward: TTCTCAGCAACAGCAAGGC; Reverse: ACTCCTTTCCGCTTCTGA           |
| <i>Ikba</i>                     | mouse   | Forward: TGACTTTGGGTGCTGATGTC; Reverse: AAGCTGGTAGGGGAGTAGC         |
| <i><math>\beta</math>-Actin</i> | mouse   | Forward: CAGCCTTCCTTCTTGGGTAT; Reverse: GGTCTTTACGGATGTCAACG        |
